# Supplementary material for: Neuroprotective Potential of Peroxisome Proliferator Activated Receptor- α Agonist in Cognitive Impairment in Parkinson’s Disease: Behavioral, Biochemical, and PBPK Profile
Source: Hindawi journal article supplement (doi:10.1155/2014/753587), 2014-01-01
Supplement: f1 [file 753587.f1.pdf]

FIGURE S1: Initial Trial Latency for different groups in passive avoidance test

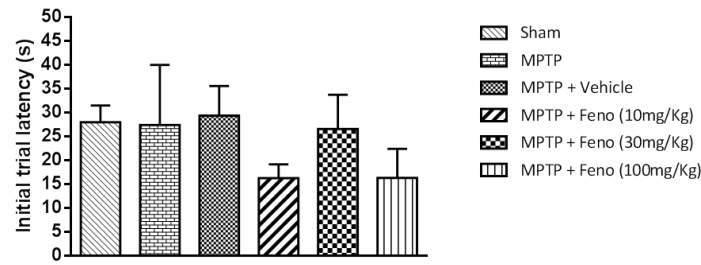

FIGURE S1: Initial Trial Latency for different groups in passive avoidance test. No significant different difference was found among different groups in Initial Trial Latency (n=6 to 10).

FIGURE S2: Latency to first entry to the platform zone for different groups during AT in MWM test

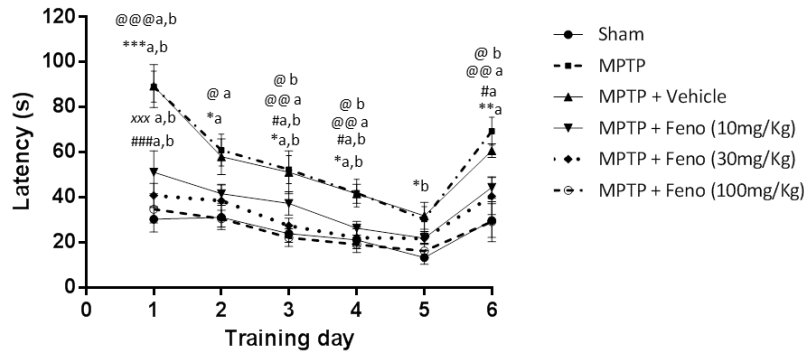

FIGURE S2: Latency to first entry to the platform zone for different groups. \*\*\*  $p < 0.001$ , \*\*  $p < 0.01$ , \*  $p < 0.05$  (a) MPTP vs sham, (b) MPTP + Vehicle vs sham; <sup>xxx</sup>  $p < 0.001$  (a) MPTP vs fenofibrate 10 mg/kg, (b) MPTP + Vehicle vs fenofibrate 10 mg/kg; <sup>###</sup>  $p < 0.001$ , <sup>##</sup>  $p < 0.01$ , <sup>#</sup>  $p < 0.05$  (a) MPTP vs fenofibrate 30 mg/kg, (b) MPTP + Vehicle vs fenofibrate 30 mg/kg, <sup>@@@</sup>  $p < 0.001$ , <sup>@@</sup>  $p < 0.01$ , <sup>@</sup>  $p < 0.05$  (a) MPTP vs fenofibrate 100 mg/kg, (b) MPTP + Vehicle vs fenofibrate 100 mg/kg. All readings are expressed as mean  $\pm$  SEM (n=8 to 12).

FIGURE S3: Number of entries to the platform zone for different groups during RT in MWM test

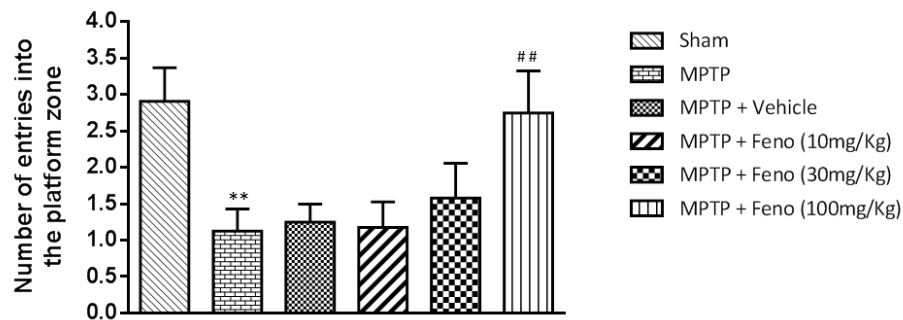

FIGURE S3: Number of entries to the platform zone for different groups during retention trial. \*\*  $p < 0.01$  MPTP vs sham,  $^{##}p \leq 0.01$  MPTP vs MPTP + fenofibrate 100 mg/kg group. All readings are expressed as mean  $\pm$  SEM (n=8 to 12).

FIGURE S4: Overall average speed for different groups on day 5 in Morris Water Maze test

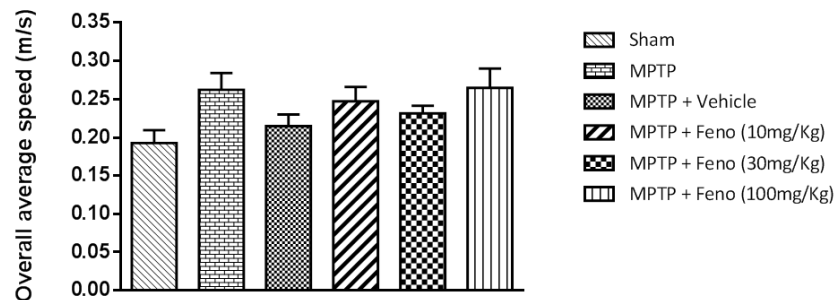

FIGURE S4: Overall average speed for different groups on day 5 in Morris Water Maze test. No significant different difference was found among different groups in overall average speed. All readings are expressed as mean  $\pm$  SEM (n=8 to 12).

FIGURE S5: Representative track-plots on Day 5 in MWM test

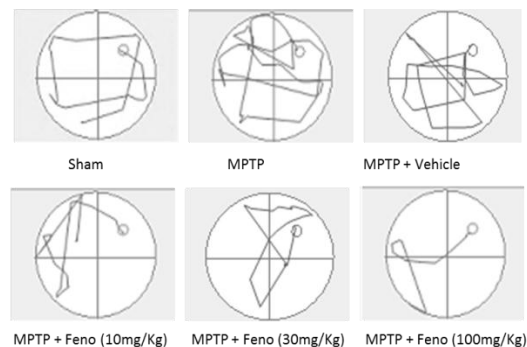

FIGURE S5: Representative path tracked for sham group, MPTP group and fenofibrate treated groups during day 5, indicating the latency to entry into the platform zone.

FIGURE S6: Representative microphotographs in TUNEL assay

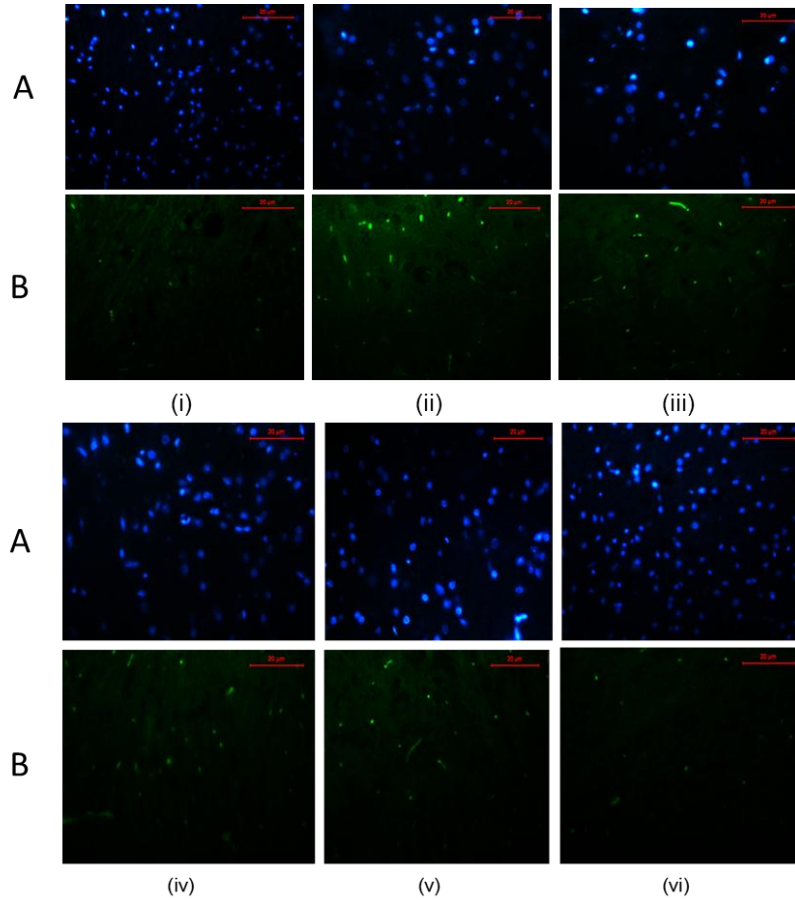

FIGURE S6: Representative microphotographs in TUNEL assay showing (A) DAPI stained total cells (B) TUNEL positive cells in substantia nigra region; (i) Sham, (ii) MPTP, (iii) MPTP + vehicle (iv) MPTP + Feno 10 mg/kg (v) MPTP + Feno 30 mg/kg, (vi) MPTP + Feno 100 mg/kg

FIGURE S7: TH immunohistochemistry to estimate TH immunopositive cells

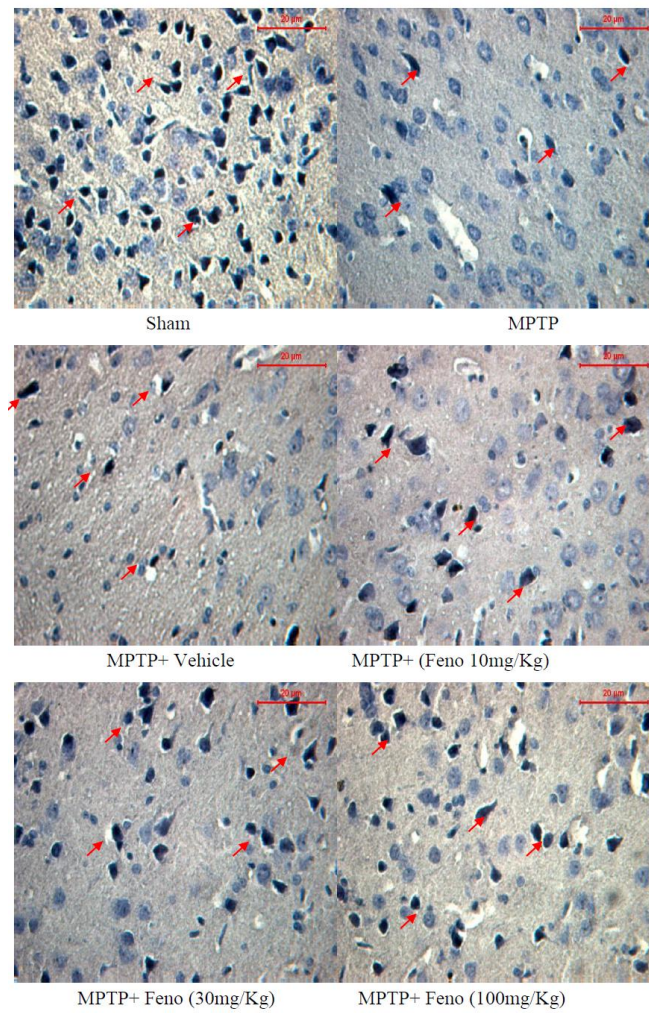

FIGURE S7: Images of immunohistochemistry to estimate TH immunopositive cells (indicated by red arrows) in substantia nigra regions. All the images were acquired at 40X magnification.
